# Supplementary material
Source: Springer Nature journal article supplement (https://www.springermedizin.de/resource/supplementary/12958_2014_1238_MOESM4_ESM.pdf/9567126)

Relative Expression  
(arbitrary units)

A

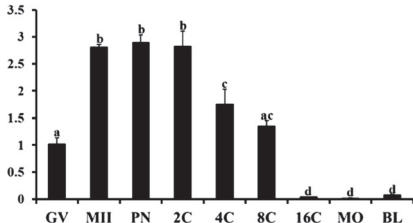

B

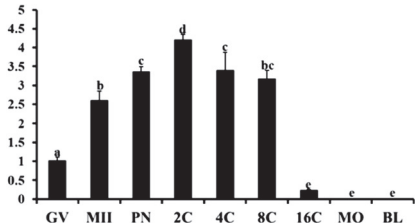

Supplement: MOESM4 [file 9567126]
